# Supplementary material for: High quality MAPbBr3 films via pulsed laser deposition of single-crystalline targets
Source: Royal Society of Chemistry journal article supplement (doi:10.1039/d4tc00563e), 2024-01-01
Supplement: d4tc00563e1.pdf [file d4tc00563e1.pdf]

## SUPPORTING INFORMATION

### High quality MAPbBr<sub>3</sub> films via pulsed laser deposition of single-crystalline targets

E. Ghavidel<sup>1,2</sup>, J. Barichello<sup>1</sup>, A. Di Carlo<sup>1,2</sup>, A. Ishteev<sup>3</sup>, K. Konstantinova<sup>3</sup>, D. Saranin<sup>3</sup>, V. Campanari<sup>1</sup>, F. Martelli<sup>4</sup>, B. Paci<sup>1</sup>, A. Generosi<sup>1</sup>, M. Guaragno<sup>1</sup>, A. Cricenti<sup>1</sup>, D. Becerrill<sup>1</sup>, M. Luce<sup>1</sup>, F. Matteocci<sup>2</sup>, and A. Di Trollo<sup>1,\*</sup>

1. CNR-Istituto di Struttura della Materia, Via del Fosso del Cavaliere 100, 00133 Roma, Italy

2. CHOSE - Dept. Electronic Engineering University of Rome Tor Vergata, via del Politecnico 1, 00133 Rome, Italy

3. LASE – Laboratory of Advanced Solar Energy, NUST MISiS, 119049 Moscow, Russia

4. CNR- Istituto per la microelettronica e microsistemi, Via del Fosso del Cavaliere 100, 00133 Roma, Italy

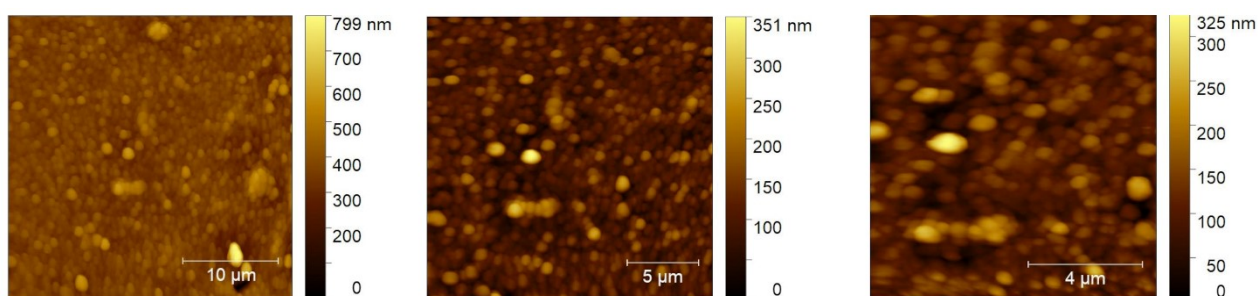

Figure S1. AFM images: from the left images 30\*30 μm, 20\*20 μm and 10\*10 μm respectively.

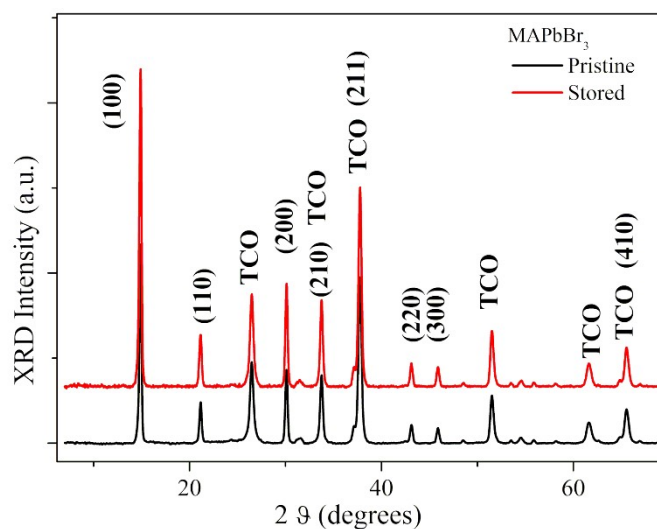

Figure S2. XRD comparison of pristine MAPbBr<sub>3</sub> sample and after storage.

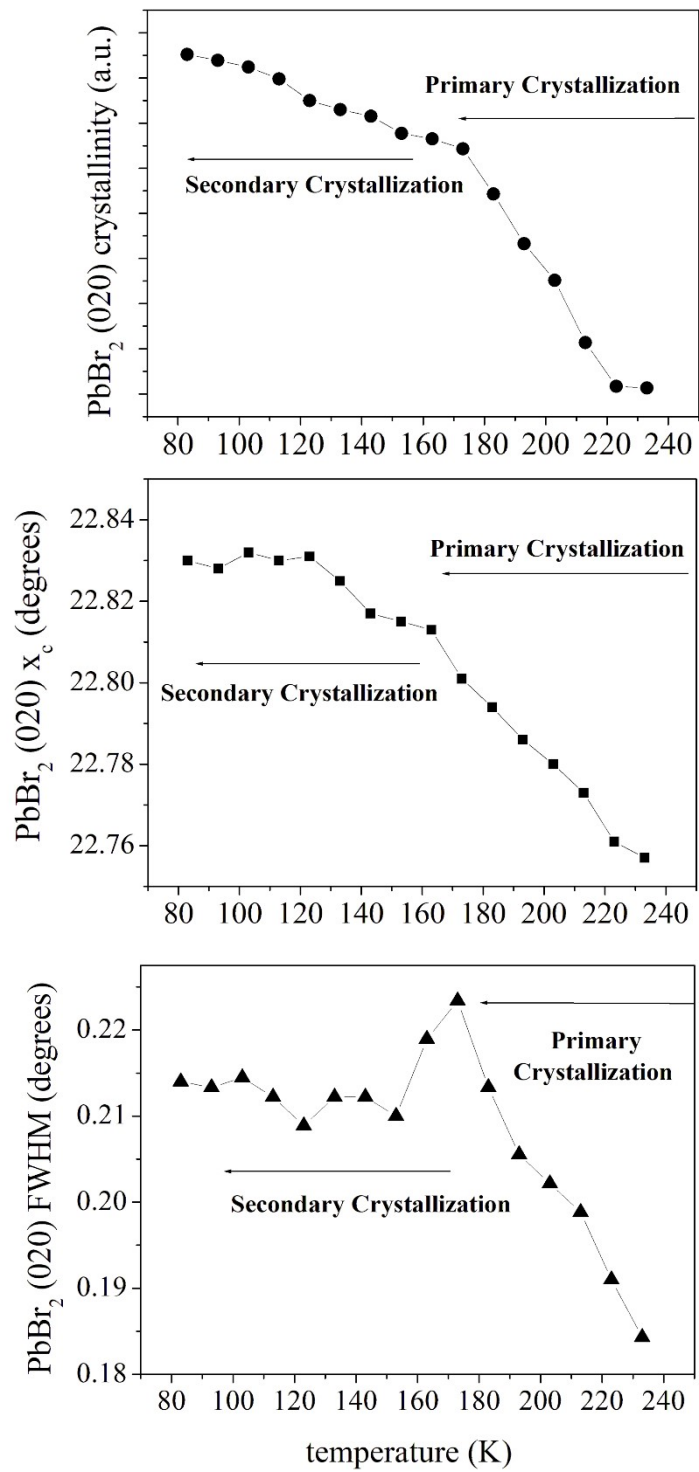

Figure S3. Temperature dependent crystallographic evolution of the PbBr<sub>2</sub> product.

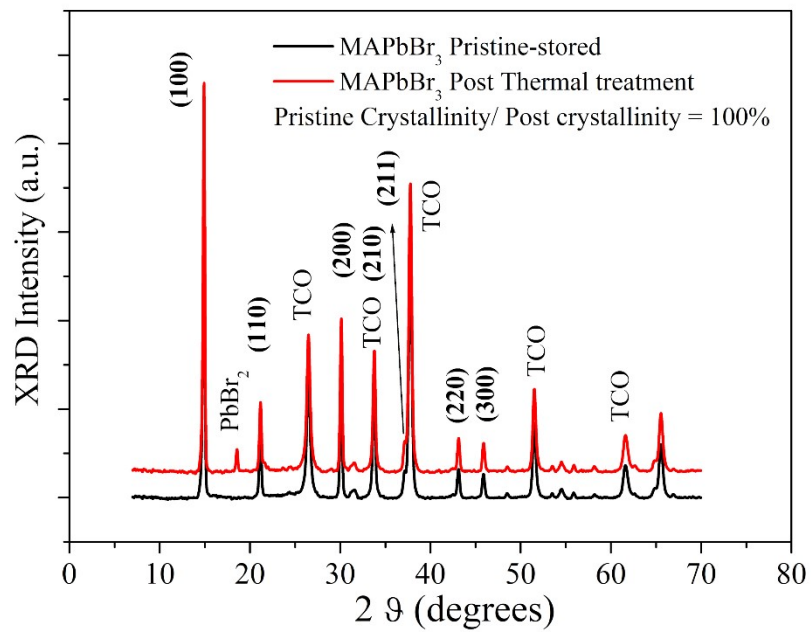

Figure S4. XRD comparison of pristine-stored and post thermal treatment MAPbBr<sub>3</sub> sample.

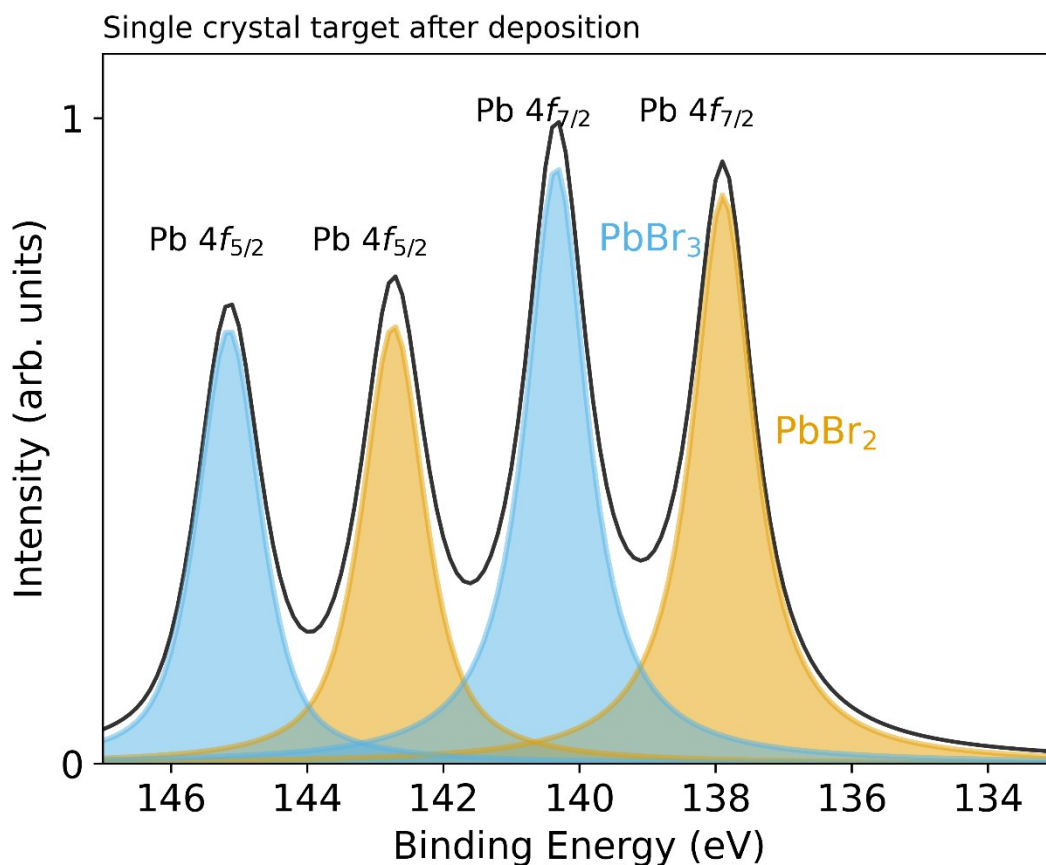

**Fig. S5.** XPS spectrum of the single crystal target after some depositions. The spectra show the presence of  $\text{PbBr}_2$  and  $\text{PbBr}_3$  phases on the sample surface. Four peaks were used to fit the spectra corresponding to Pb 4f electrons of the  $\text{PbBr}_2$  and  $\text{PbBr}_3$  phase.

**Table S1.** Fitting parameters of Pb 4d spectra of the sample substrate (crystal) film including the peak position, full width at half maximum (FWHM) and the relative contributions of Pb 5/2 and Pb 7/2. The contribution is calculated taking both  $\text{PbBr}_2$  and  $\text{PbBr}_3$  phases.

|                  |                 | Pb 4f 5/2 | Pb 4f 7/2 |
|------------------|-----------------|-----------|-----------|
| Center (eV)      | $\text{PbBr}_2$ | 142.7     | 137.9     |
| Fwhm (eV)        |                 | 1.1       | 1.1       |
| Contribution (%) |                 | 20.8      | 29.3      |
| Center (eV)      | $\text{PbBr}_3$ | 145.1     | 140.3     |
| Fwhm (eV)        |                 | 1.1       | 1.1       |
| Contribution (%) |                 | 19.3      | 30.6      |

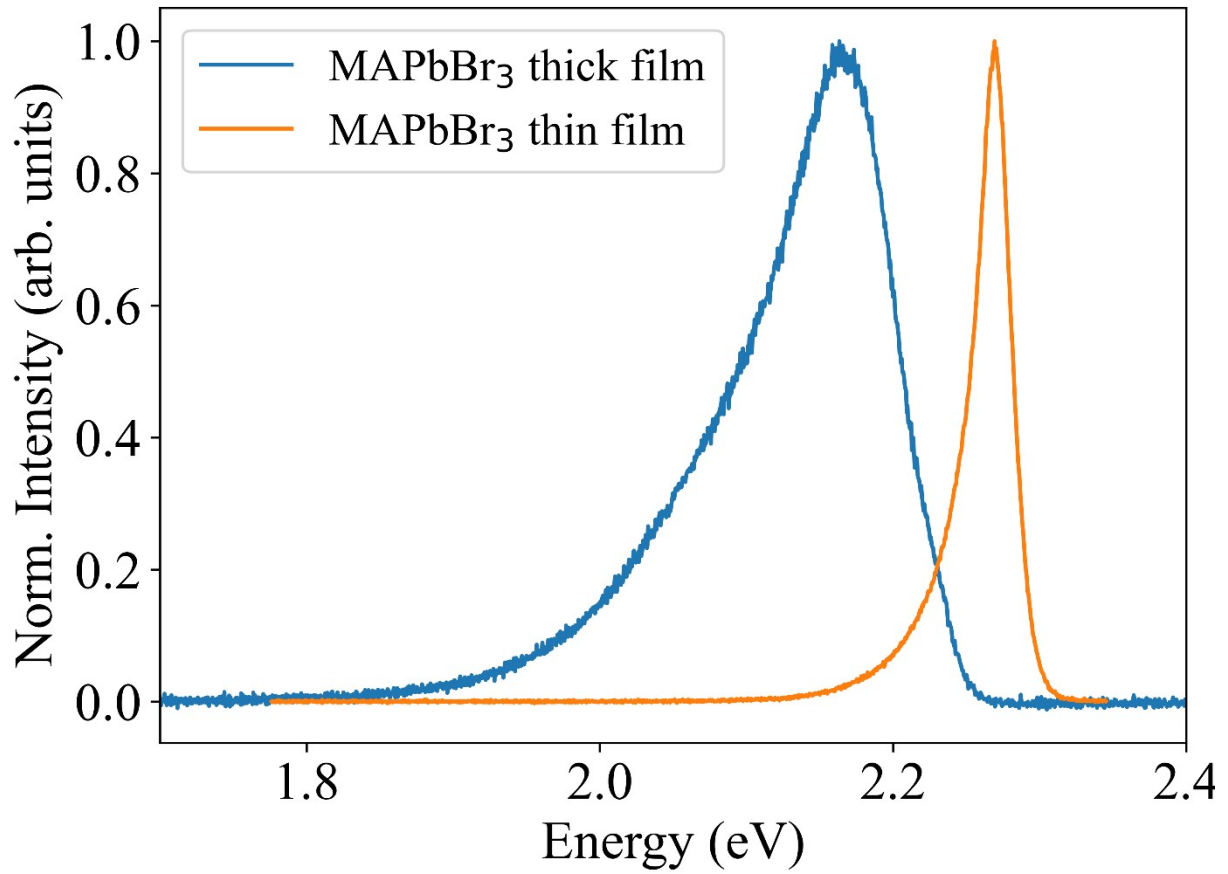

Figure S6. PL spectra at 12 K of thin (100 nm) and thick films grown from single crystal target.

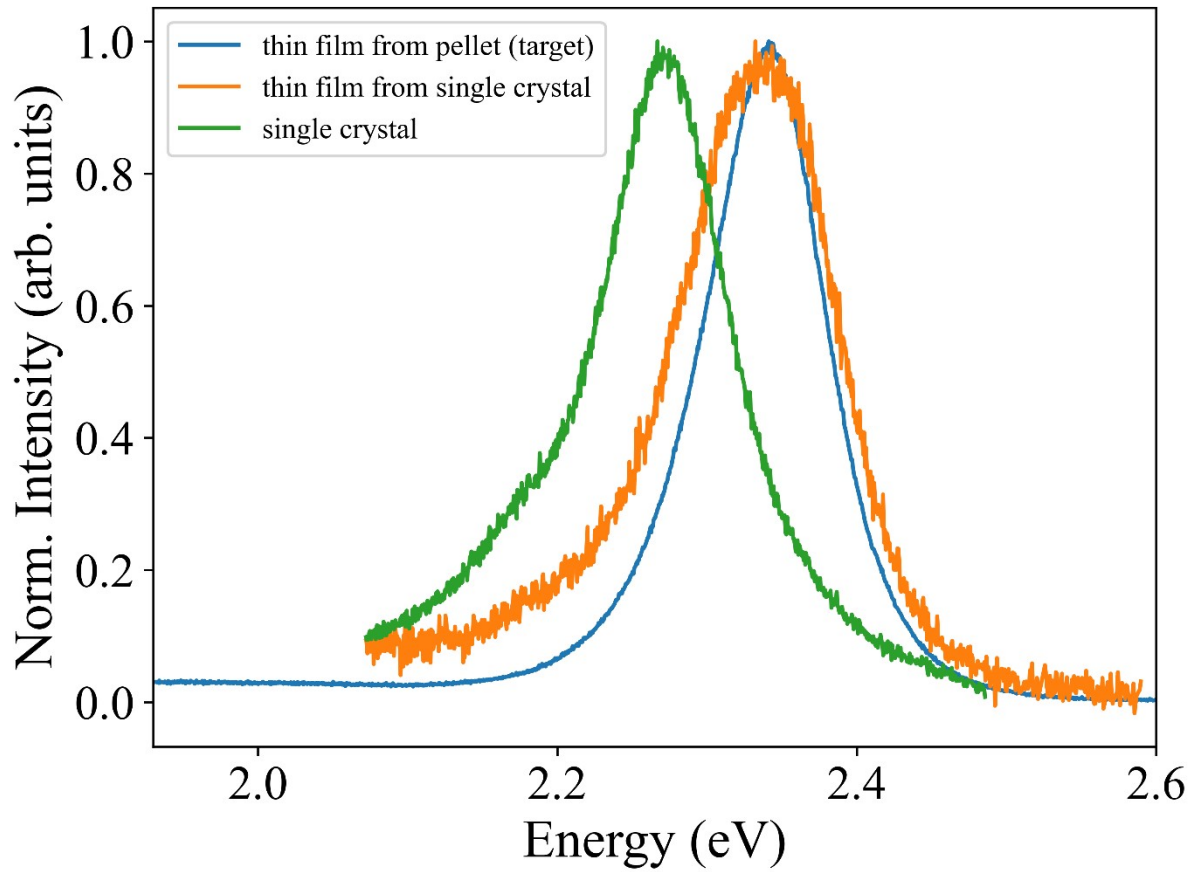

Figure S7. PL spectra at 300K of a thin film grown from a single crystal target (brown line) and from a pellet sintered from pressed powders (blue). The green line represents the spectrum of the single crystal used as PLD target
